# Supplementary material for: The HSV-1 Transcription Factor ICP4 Confers Liquid-Like Properties to Viral Replication Compartments
Source: MDPI journal article supplement (doi:10.3390/ijms22094447), 2021-04-24

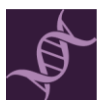

**Table S1.** Examples of cited viral IDPs that can undergo LLPS

| #  | Accession # | Protein Name            | VSL2 score [%] | Citation |
|----|-------------|-------------------------|----------------|----------|
| 1  | Q8AZK7      | EBV EBNA1P              | 100.0          | [1]      |
| 2  | P12978      | EBV EBNA2               | 91.2           | [1]      |
| 3  | Q77M42      | MeV Phosphoprotein (P)  | 77.5           | [2,3]    |
| 4  | P03520      | VSV Phosphoprotein (P)  | 59.6           | [4,5]    |
| 5  | P16286      | RABV Phosphoprotein (P) | 49.5           | [6]      |
| 6  | P03466      | IVA Nucleoprotein (NP)  | 46.6           | [7]      |
| 7  | Q77M43      | MeV Nucleoprotein (N)   | 38.3           | [2,3]    |
| 8  | P03433      | IVA (PA)                | 35.6           | [7]      |
| 9  | P16285      | RABV Nucleoprotein (N)  | 25.1           | [6]      |
| 10 | P03523      | VSV RdR Pol (L)         | 19.0           | [4]      |
| 11 | P03521      | VSV Nucleoprotein (N)   | 17.3           | [4]      |

The overall percentage VSL2 scores (VSL2 score [%]) and the corresponding citations are annotated. The viral proteins at the bottom of the list were not considered because they are either not able to undergo LLPS per se, or they are auxiliary factors promoting LLPS of other viral proteins (grey box).

**Table S2. HSV-1 proteome disorder scores**

| #  | Gene/ORF              | Accession # | Protein Name                                       | VSL2 score [%] | e | ne | IE | E | L | ns | cap | teg | env |
|----|-----------------------|-------------|----------------------------------------------------|----------------|---|----|----|---|---|----|-----|-----|-----|
| 1  | US11                  | P04487      | Accessory factor, RNA binding protein US11         | 100.0          |   |    |    |   |   |    |     |     |     |
| 2  | $\gamma$ 1 34.5 / RL1 | P36313      | Neurovirulence factor ICP34.5                      | 100.0          |   |    |    |   |   |    |     |     |     |
| 3  | UL56                  | P10240      | Protein UL56                                       | 95.9           |   |    |    |   |   |    |     |     |     |
| 4  | US12                  | P03170      | ICP47 protein                                      | 81.8           |   |    |    |   |   |    |     |     |     |
| 5  | US1                   | P04485      | Transcriptional regulator ICP22                    | 78.6           |   |    |    |   |   |    |     |     |     |
| 6  | UL49                  | P10233      | Tegument protein VP22                              | 78.1           |   |    |    |   |   |    |     |     |     |
| 7  | $\alpha$ 4            | P08392      | Major viral transcription factor ICP4              | 74.9           |   |    |    |   |   |    |     |     |     |
| 8  | $\alpha$ 0 / RL2      | P08393      | (IE110) E3 ubiquitin -protein ligase               | 74.8           |   |    |    |   |   |    |     |     |     |
| 9  | US4                   | P06484      | Envelope glycoprotein G                            | 71.9           |   |    |    |   |   |    |     |     |     |
| 10 | UL14                  | P04291      | Tegument protein UL14                              | 70.3           |   |    |    |   |   |    |     |     |     |
| 11 | UL26                  | P10210      | Capsid scaffolding protein                         | 63.9           |   |    |    |   |   |    |     |     |     |
| 12 | UL11                  | P04289      | Cytoplasmic envelopment protein 3                  | 63.5           |   |    |    |   |   |    |     |     |     |
| 13 | US10                  | P06486      | Viral protein US10                                 | 61.9           |   |    |    |   |   |    |     |     |     |
| 14 | UL3                   | P10187      | Nuclear phosphoprotein UL3                         | 60.4           |   |    |    |   |   |    |     |     |     |
| 15 | UL54                  | P10238      | RNA processing protein ICP27                       | 57.0           |   |    |    |   |   |    |     |     |     |
| 16 | US9                   | P06481      | Envelope protein US9                               | 56.7           |   |    |    |   |   |    |     |     |     |
| 17 | UL36                  | P10220      | Large tegument protein deneddylase                 | 53.2           |   |    |    |   |   |    |     |     |     |
| 18 | US8                   | P04488      | Envelope glycoprotein E                            | 49.5           |   |    |    |   |   |    |     |     |     |
| 19 | US3                   | P04413      | Serine/threonine-protein kinase US3                | 48.4           |   |    |    |   |   |    |     |     |     |
| 20 | UL48                  | P06492      | Tegument protein VP16                              | 47.6           |   |    |    |   |   |    |     |     |     |
| 21 | UL46                  | P10230      | Tegument protein UL46, VP11/12                     | 46.8           |   |    |    |   |   |    |     |     |     |
| 22 | UL47                  | P10231      | Tegument protein UL47, VP13/14                     | 46.5           |   |    |    |   |   |    |     |     |     |
| 23 | US7                   | P06487      | Envelope glycoprotein I                            | 46.4           |   |    |    |   |   |    |     |     |     |
| 24 | UL42                  | P10226      | DNA polymerase processivity factor                 | 45.7           |   |    |    |   |   |    |     |     |     |
| 25 | US2                   | P06485      | Protein US2                                        | 43.0           |   |    |    |   |   |    |     |     |     |
| 26 | UL24                  | P10208      | Protein UL24                                       | 42.8           |   |    |    |   |   |    |     |     |     |
| 27 | UL38                  | P02310      | Triplex capsid protein VP19C                       | 42.7           |   |    |    |   |   |    |     |     |     |
| 28 | UL12                  | P04294      | Alkaline nuclease                                  | 42.7           |   |    |    |   |   |    |     |     |     |
| 29 | UL32                  | P10216      | Packaging protein                                  | 40.8           |   |    |    |   |   |    |     |     |     |
| 30 | UL44                  | P10228      | Envelope glycoprotein C                            | 40.3           |   |    |    |   |   |    |     |     |     |
| 31 | UL34                  | P10218      | Nuclear egress protein 2                           | 39.3           |   |    |    |   |   |    |     |     |     |
| 32 | UL51                  | P10235      | Tegument protein UL51                              | 38.9           |   |    |    |   |   |    |     |     |     |
| 33 | UL35                  | P10219      | Small capsomere-interacting protein, VP26          | 38.4           |   |    |    |   |   |    |     |     |     |
| 34 | UL2                   | P10186      | Uracil-DNA glycosylase                             | 38.0           |   |    |    |   |   |    |     |     |     |
| 35 | UL1                   | P10185      | Glycoprotein L                                     | 37.5           |   |    |    |   |   |    |     |     |     |
| 36 | UL41                  | P10225      | Virion host shutoff protein                        | 37.2           |   |    |    |   |   |    |     |     |     |
| 37 | UL33                  | P10217      | Tripartite terminase subunit 2                     | 33.9           |   |    |    |   |   |    |     |     |     |
| 38 | UL4                   | P10188      | Nuclear protein UL4                                | 33.2           |   |    |    |   |   |    |     |     |     |
| 39 | US5                   | P06480      | Envelope glycoprotein J                            | 32.6           |   |    |    |   |   |    |     |     |     |
| 40 | UL27                  | P10211      | Glycoprotein B                                     | 31.2           |   |    |    |   |   |    |     |     |     |
| 41 | UL39                  | P08543      | Ribonucleoside-diphosphate reductase large subunit | 30.5           |   |    |    |   |   |    |     |     |     |
| 42 | UL6                   | P10190      | Portal protein                                     | 29.7           |   |    |    |   |   |    |     |     |     |
| 43 | UL43                  | P10227      | Membrane protein UL43                              | 29.5           |   |    |    |   |   |    |     |     |     |
| 44 | UL37                  | P10221      | Inner tegument protein                             | 28.9           |   |    |    |   |   |    |     |     |     |
| 45 | UL25                  | P10209      | Capsid vertex component 2                          | 28.6           |   |    |    |   |   |    |     |     |     |
| 46 | UL13                  | P04290      | Serine/threonine-protein kinase UL13               | 28.6           |   |    |    |   |   |    |     |     |     |
| 47 | UL17                  | P10201      | Capsid vertex component 1                          | 28.0           |   |    |    |   |   |    |     |     |     |
| 48 | UL55                  | P10239      | Tegument protein UL55                              | 28.0           |   |    |    |   |   |    |     |     |     |
| 49 | UL10                  | P04288      | Glycoprotein M                                     | 27.3           |   |    |    |   |   |    |     |     |     |
| 50 | UL16                  | P10200      | Cytoplasmic envelopment protein 2                  | 27.1           |   |    |    |   |   |    |     |     |     |
| 51 | UL50                  | P10234      | Deoxyuridine 5'-triphosphate nucleotidohydrolase   | 26.7           |   |    |    |   |   |    |     |     |     |
| 52 | UL23                  | P03176      | Thymidine kinase                                   | 26.1           |   |    |    |   |   |    |     |     |     |

A total of 71 proteins of the HSV-1 proteome were assessed with the VSL2 algorithm of the online platform PONDR. The following features are annotated for each protein: Overall percentage VSL2 scores (VSL2 score [%]), if it is essential (e) or non-essential (ne), if it is an immediate early (IE), early (E) or late (L) protein, and if it is non-structural (ns), a capsid (cap), a tegument (teg) or an envelope (env) protein. The four latency-associated proteins/transcripts at the bottom of the list were not considered (grey box). Green boxes indicate that the protein belongs to the corresponding protein class in the column; yellow boxes = not essential in non-dividing cells. The essential HSV-1 IE proteins ICP4 and ICP27 are highlighted in red.

**Table S3.** Examples of cited human IDPs that can undergo LLPS

| #  | Accession # | Protein Name     | VSL2 score [%] | Citation |
|----|-------------|------------------|----------------|----------|
| 1  | Q01844      | EWS              | 93.8           | [8]      |
| 2  | Q92804      | Taf15            | 92.6           | [8]      |
| 3  | P35637      | FUS              | 90.7           | [8]      |
| 4  | O60885      | BRD4             | 86.9           | [9]      |
| 5  | Q01130      | SRSF2            | 83.7           | [10]     |
| 6  | Q14103      | hnRNPD           | 83.1           | [11]     |
| 7  | Q96PK6      | RBM14            | 81.3           | [10]     |
| 8  | P08047      | SP1              | 79.2           | [8]      |
| 9  | O14979      | hnRDL            | 76.9           | [11]     |
| 10 | Q9UER7      | DAXX             | 73.0           | [12]     |
| 11 | Q01860      | OCT4             | 71.9           | [13]     |
| 12 | P09651      | hnRNPA1          | 70.2           | [10]     |
| 13 | P51991      | hnRNPA3          | 70.1           | [11]     |
| 14 | P22626      | hnRNPA2B1        | 70.0           | [11]     |
| 15 | Q15648      | MED1             | 70.0           | [9]      |
| 16 | P06748      | NPM1             | 61.2           | [12]     |
| 17 | Q13148      | TDP-43           | 57.3           | [10]     |
| 18 | P29590      | PML              | 53.1           | [14]     |
| 19 | P22087      | Fibrillarin      | 45.2           | [10]     |
| 20 | Q9NQI0      | DDX4             | 45.0           | [10]     |
| 21 | P24928      | RPB1             | 43.2           | [15]     |
| 22 | P31483      | Tia1             | 38.6           | [10]     |
| 23 | P35222      | $\beta$ -catenin | 30.4           | [16]     |
| 24 | P42858      | Huntingtin       | 29.2           | [14]     |

The overall percentage VSL2 scores (VSL2 score [%]) and the corresponding citations are annotated. This list is not exhaustive and represents only a selection of relevant human proteins that can undergo LLPS.

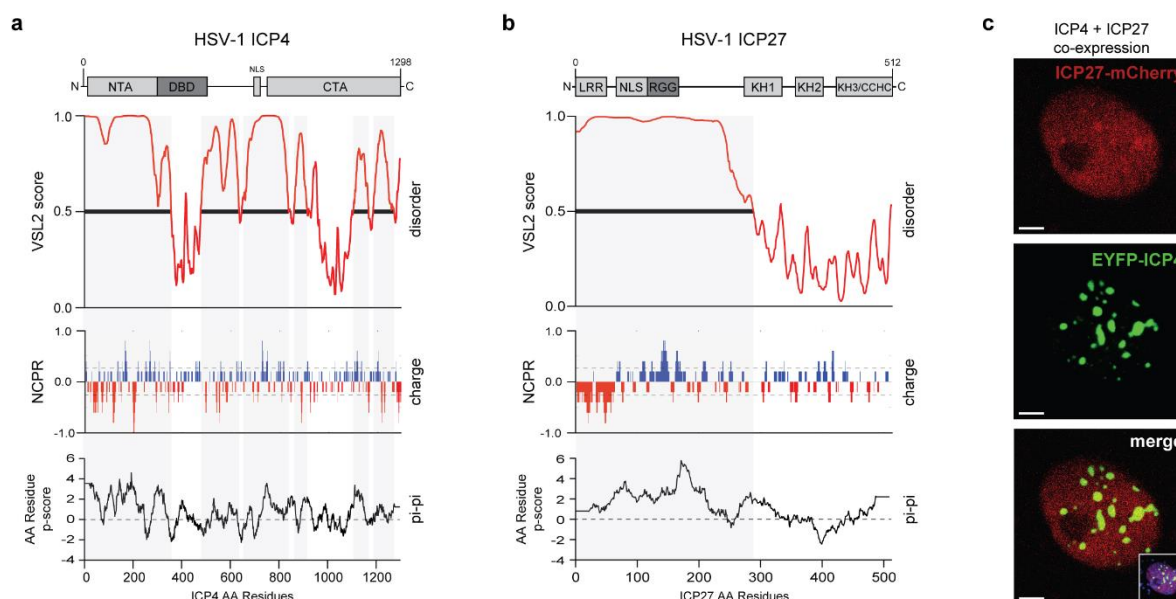

**Figure S1.** ICP4 and ICP27 LLPS predictors; The ICP4 (a) and ICP27 (b) relevant protein domains, the VSL2 disorder score profiles, net charge per residue (NCPR) and AA-residue p-scores of the pi-pi stacking predictor are shown. The IDRs of each protein are highlighted with a horizontal black line and a light-grey box. (c) ICP4 droplet formation is independent of ICP27. Vero cells were co-transfected with 0.1 μg of mCherry2-ICP27 and 0.15 μg of pIE3-EYFPICP4. The cells were counterstained with Hoechst 33342 at 16 hpt and subjected to CLSM. Scale bar: 3 μm.

## References

- Peng, Q.; Wang, L.; Qin, Z.; Wang, J.; Zheng, X.; Wei, L.; Zhang, X.; Zhang, X.; Liu, C.; Li, Z., et al. Phase Separation of Epstein-Barr Virus EBNA2 and Its Coactivator EBNA1 Controls Gene Expression. *J Virol* **2020**, *94*, doi:10.1128/JVI.01771-19.
- Guseva, S.; Milles, S.; Jensen, M.R.; Salvi, N.; Kleman, J.P.; Maurin, D.; Ruigrok, R.W.H.; Blackledge, M. Measles virus nucleo- and phosphoproteins form liquid-like phase-separated compartments that promote nucleocapsid assembly. *Sci Adv* **2020**, *6*, eaaz7095, doi:10.1126/sciadv.aaz7095.
- Zhou, Y.; Su, J.M.; Samuel, C.E.; Ma, D. Measles Virus Forms Inclusion Bodies with Properties of Liquid Organelles. *J Virol* **2019**, *93*, doi:10.1128/JVI.00948-19.
- Heinrich, B.S.; Maliga, Z.; Stein, D.A.; Hyman, A.A.; Whelan, S.P.J. Phase Transitions Drive the Formation of Vesicular Stomatitis Virus Replication Compartments. *mBio* **2018**, *9*, doi:10.1128/mBio.02290-17.
- Leyrat, C.; Schneider, R.; Ribeiro, E.A., Jr.; Yabukarski, F.; Yao, M.; Gerard, F.C.; Jensen, M.R.; Ruigrok, R.W.; Blackledge, M.; Jamin, M. Ensemble structure of the modular and flexible full-length vesicular stomatitis virus phosphoprotein. *J Mol Biol* **2012**, *423*, 182-197, doi:10.1016/j.jmb.2012.07.003.
- Nikolic, J.; Le Bars, R.; Lama, Z.; Scrima, N.; Lagaudriere-Gesbert, C.; Gaudin, Y.; Blondel, D. Negri bodies are viral factories with properties of liquid organelles. *Nat Commun* **2017**, *8*, 58, doi:10.1038/s41467-017-00102-9.
- Alenquer, M.; Vale-Costa, S.; Etibor, T.A.; Ferreira, F.; Sousa, A.L.; Amorim, M.J. Influenza A virus ribonucleoproteins form liquid organelles at endoplasmic reticulum exit sites. *Nat Commun* **2019**, *10*, 1629, doi:10.1038/s41467-019-09549-4.

8. Chong, S.; Dugast-Darzacq, C.; Liu, Z.; Dong, P.; Dailey, G.M.; Cattoglio, C.; Heckert, A.; Banala, S.; Lavis, L.; Darzacq, X., et al. Imaging dynamic and selective low-complexity domain interactions that control gene transcription. *Science* **2018**, *361*, doi:10.1126/science.aar2555.
9. Sabari, B.R.; Dall'Agnese, A.; Boija, A.; Klein, I.A.; Coffey, E.L.; Shrinivas, K.; Abraham, B.J.; Hannett, N.M.; Zamudio, A.V.; Manteiga, J.C., et al. Coactivator condensation at super-enhancers links phase separation and gene control. *Science* **2018**, *361*, doi:10.1126/science.aar3958.
10. Courchaine, E.M.; Lu, A.; Neugebauer, K.M. Droplet organelles? *EMBO J* **2016**, *35*, 1603-1612, doi:10.15252/embj.201593517.
11. Wang, J.; Choi, J.M.; Holehouse, A.S.; Lee, H.O.; Zhang, X.; Jahnel, M.; Maharana, S.; Lemaitre, R.; Pozniakovsky, A.; Drechsel, D., et al. A Molecular Grammar Governing the Driving Forces for Phase Separation of Prion-like RNA Binding Proteins. *Cell* **2018**, *174*, 688-699 e616, doi:10.1016/j.cell.2018.06.006.
12. Banani, S.F.; Lee, H.O.; Hyman, A.A.; Rosen, M.K. Biomolecular condensates: organizers of cellular biochemistry. *Nat Rev Mol Cell Biol* **2017**, *18*, 285-298, doi:10.1038/nrm.2017.7.
13. Boija, A.; Klein, I.A.; Sabari, B.R.; Dall'Agnese, A.; Coffey, E.L.; Zamudio, A.V.; Li, C.H.; Shrinivas, K.; Manteiga, J.C.; Hannett, N.M., et al. Transcription Factors Activate Genes through the Phase-Separation Capacity of Their Activation Domains. *Cell* **2018**, *175*, 1842-1855 e1816, doi:10.1016/j.cell.2018.10.042.
14. Bergeron-Sandoval, L.P.; Safaee, N.; Michnick, S.W. Mechanisms and Consequences of Macromolecular Phase Separation. *Cell* **2016**, *165*, 1067-1079, doi:10.1016/j.cell.2016.05.026.
15. Boehning, M.; Dugast-Darzacq, C.; Rankovic, M.; Hansen, A.S.; Yu, T.; Marie-Nelly, H.; McSwiggen, D.T.; Kokic, G.; Dailey, G.M.; Cramer, P., et al. RNA polymerase II clustering through carboxy-terminal domain phase separation. *Nat Struct Mol Biol* **2018**, *25*, 833-840, doi:10.1038/s41594-018-0112-y.
16. Zamudio, A.V.; Dall'Agnese, A.; Henninger, J.E.; Manteiga, J.C.; Afeyan, L.K.; Hannett, N.M.; Coffey, E.L.; Li, C.H.; Oksuz, O.; Sabari, B.R., et al. Mediator Condensates Localize Signaling Factors to Key Cell Identity Genes. *Mol Cell* **2019**, *76*, 753-766 e756, doi:10.1016/j.molcel.2019.08.016.

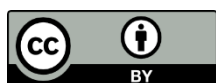

Supplement: s1 [file s1]
